# Supplementary material for: A water-soluble near-infrared probe for colorimetric and ratiometric sensing of SO2derivatives in living cells
Source: Royal Society of Chemistry journal article supplement (doi:10.1039/c3cc46468g), 2013-10-24

## Supporting Information

# A Water-Soluble Near-Infrared Probe for Colorimetric and Ratiometric Sensing of SO<sub>2</sub> Derivatives in Living Cells

Ming-Yu Wu, Kun Li\*, Chun-Yan Li, Ji-Ting Hou, Xiao-Qi Yu\*

*Key Laboratory of Green Chemistry and Technology, Ministry of Education, College of Chemistry, Sichuan University, Chengdu, 610064, China Fax: (86)-28-85415886 ; Tel: (86)-28-85415886; E-mail: xqyu@scu.edu.cn; kli@scu.edu.cn.*

### Content:

|                                                                                                                                 |         |
|---------------------------------------------------------------------------------------------------------------------------------|---------|
| 1. General information and methods.                                                                                             | S2      |
| 2. Synthesis of probe 1 and 2                                                                                                   | S2-S3   |
| 3. Quantum Yields                                                                                                               | S3-S4   |
| 4. The absorption and emission spectra of probe 1 in different solvents                                                         | S4      |
| 5. The fluorescent spectrum of probe 1 in different water content solutions                                                     | S4-S5   |
| 6. The absorption and emission spectra of probe 2 in different solvents                                                         | S5      |
| 7. Photophysical properties of probe 1 and probe 2 in various solvents                                                          | S5-S6   |
| 8. The photobleaching of probe 2 under visible and UV light                                                                     | S6-S7   |
| 9. The absorption and emission spectra of probe 2 in different pH buffer solution                                               | S7-S8   |
| 10. The time course of probe 2 with sulfite and bisulfite                                                                       | S8-S9   |
| 11. The influence of pH value to emission spectrum and the intensity ratio changes of the reaction between probe 2 with sulfite | S9      |
| 12. The detection limit of probe 2 to sulfite                                                                                   | S10     |
| 13. The fluorescent titration and the detection limit of probe 2 with bisulfate                                                 | S10-S11 |
| 14. The high resolution mass spectrum and <sup>1</sup> H NMR spectra of probe 2 with sulfite                                    | S11-S12 |
| 15. The absorption spectra of TCF, probe 2 and the reaction of probe 2 with sulfite                                             | S12     |
| 16. The response of SO <sub>2</sub> releasing agent to probe 2                                                                  | S12-S13 |
| 17. Cell toxicity test                                                                                                          | S14     |
| 18. Cell culture fluorescence imaging                                                                                           | S14     |
| 19. <sup>1</sup> H NMR and <sup>13</sup> C NMR and high resolution mass spectra                                                 | S14-S23 |

## 1. General information and methods.

Unless otherwise noted, materials were obtained from commercial suppliers and were used without further purification. All the solvents were dried according to the standard methods prior to use. All of the solvents were either HPLC or spectroscopic grade in the optical spectroscopic studies. TLC analyses were performed on silica gel GF 254. Column chromatographic purifications were carried out on silica gel (HG/T2354-92). NMR spectra were measured on a Bruker AMX-400. The  $^1\text{H}$  NMR (400 MHz) chemical shifts were given in ppm relative to the internal reference TMS. The  $^{13}\text{C}$  NMR (100 MHz) chemical shifts were given using  $\text{CDCl}_3$  and  $\text{DMSO}-d_6$  as the internal standard. ESI-MS and HR-MS spectral data were recorded on a Finnigan LCQDECA and a BrukerDaltonics Bio TOF mass spectrometer, respectively. Fluorescence excitation and emission spectra were obtained using FluoroMax-4 Spectrofluoro photometer (HORIBA JobinYvon). UV-Vis absorption spectra were recorded on a Hitachi PharmaSpec UV-1900 UV-Visible spectrophotometer. A stock solution of the probe **1**, and **2**, (0.5 mM) were prepared in DMSO. All the stock solutions of anions and reactive sulfur were prepared with corresponding sodium salts in deionized water at a concentration of 20 mM. Test solutions were prepared by placing 25  $\mu\text{L}$  of the probe stock solution into a test tube, diluting the solution to 2.5 mL with HEPES pH 7.4 buffer solution, and adding an appropriate aliquot of each anion stock. Fluorescence spectra were measured after 90 seconds upon the addition of anions. Fluorescent quantum yields were determined by standard methods, using fluorescein ( $\Phi = 0.85$  in 0.1 N NaOH) as a standard.

## 2. Synthesis of probe 1 and 2

### 2-(3-cyano-4,5,5-trimethylfuran-2(5H)-ylidene)malononitrile (TCF):<sup>1</sup>

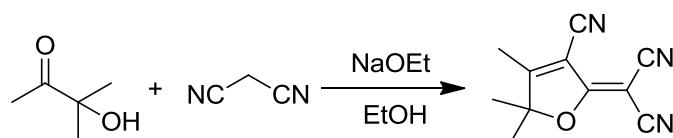

To 900 mg of sodium ethoxide (13 mmol, 0.15 equiv) dissolved in 10 mL of absolute EtOH in a room temperature water bath was added 9 g 3-hydroxy-3-methyl-2-butanone (88 mmol) and 12 g freshly distilled malononitrile (181 mmol, 2.05 equiv) with stirring. After 1 hr 30 mL of absolute EtOH was added and heated at reflux for 1 additional hr. This is cooled in a refrigerator and the solid filter, washed with a minimal amount of cold EtOH, and then air dried giving a first crop of 11.6 g of off-white crystalline solid (65% yield). Concentration of the filtrate and cooling gave a second crop of 0.48 g product (total yield 68%).  $^1\text{H}$  NMR (400 MHz,  $\text{CDCl}_3$ ),  $\delta$  8.36 (s, 3H), 1.63 (s, 6H);  $^{13}\text{C}$  NM (100 MHz,  $\text{CDCl}_3$ ),  $\delta$  182.7, 175.3, 111.0, 110.4, 109.0, 104.8, 99.8, 58.4, 24.3, 14.2. ESI MS: 222.1  $[\text{M} + \text{Na}]^+$

### (E)-2-(3-cyano-4-(2-(7-(diethylamino)-2-oxo-2H-chromen-3-yl)vinyl)-5,5-dimethylfuran-2(5H)-ylidene)malononitrile (probe 1):

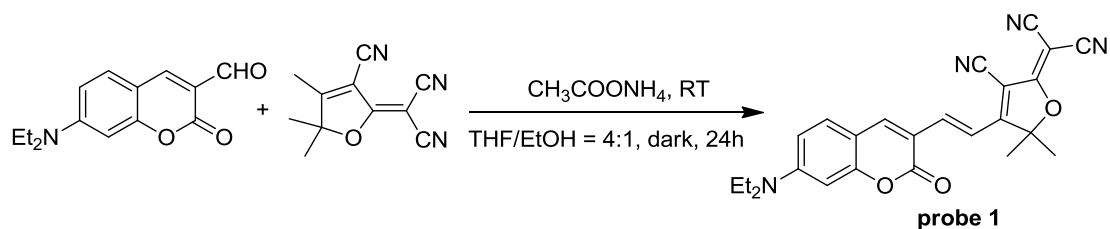

245.1 mg (1 mmol) of 7-diethylamine coumarin aldehyde, 219 mg TCF (1.1 mmol, 1.1 equiv) and 85 mg ammonium acetate (1.1 mmol, 1.1 equiv.) were dissolved in 10 ml THF/EtOH = 4:1 mixture solvents, and stirred under dark for 24 hr, greyish-green solid were obtained through filtrating and recrystallizing from EtOH with 370 mg (87% yield).  $^1\text{H}$  NMR (400 MHz, DMSO- $d_6$ ),  $\delta$  8.53 (s, 1H), 7.76 (d, 1H,  $J$  = 16.0 Hz), 7.62 (d, 1H,  $J$  = 16.0 Hz), 7.54 (d, 1H,  $J$  = 9.2 Hz), 6.86 (dd, 1H,  $J$  = 2.0 Hz,  $J$  = 9.0 Hz), 6.67 (d, 1H,  $J$  = 1.6 Hz), 3.54 (q, 4H,  $J$  = 6.8 Hz), 1.79 (s, 1H), 1.16 (t, 6H,  $J$  = 6.8 Hz);  $^{13}\text{C}$  NM (100 MHz,  $\text{CDCl}_3$ ),  $\delta$  177.5, 176.3, 159.6, 157.6, 153.8, 149.5, 145.0, 132.3, 114.4, 113.5, 113.1, 112.7, 111.6, 111.3, 109.6, 99.0, 97.4, 96.9, 53.4, 45.1, 26.1, 12.9. HRMS (ESI):  $m/z$   $[\text{M} + \text{Na}]^+$  calcd for  $\text{C}_{25}\text{H}_{22}\text{N}_4\text{NaO}_3$ : 449.1584; found 449.1589.

**(E)-2-(3-cyano-4-(2-(7-hydroxy-2-oxo-2H-chromen-3-yl)vinyl)-5,5-dimethylfuran-2(5H)-ylidene)malononitrile (probe 2):**

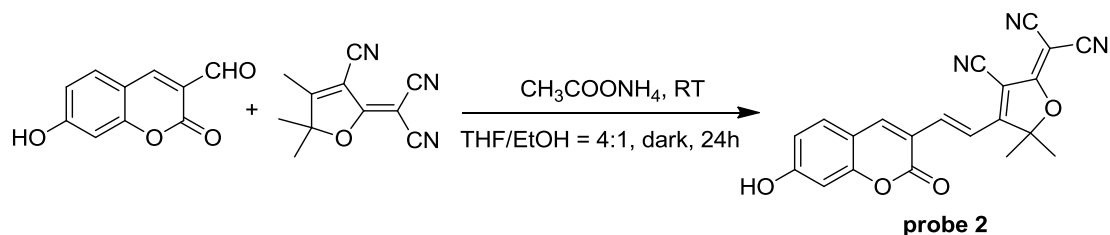

190 mg (1 mmol) of 7-hydroxy coumarin aldehyde, 219 mg TCF (1.1 mmol, 1.1 equiv) and 85 mg ammonium acetate (1.1 mmol, 1.1 equiv.) were dissolved in 10 ml THF/EtOH = 4:1 mixture solvents, and stirred under dark for 24 hr. After distilling the solvent, the residues were extracted with 30 ml ethyl acetate three times. The combined organic layers were dried over  $\text{Na}_2\text{SO}_4$ , filtered, and concentrated under reduced pressure. The crude product was purified by chromatography on a silica gel column using DCM / EA = 2:1 as the mobile phase, affording probe 2 as a red powder 185.1 mg (50% yield).  $^1\text{H}$  NMR (400 MHz, DMSO- $d_6$ ),  $\delta$  11.26 (s, 1H), 8.67 (s, 1H), 7.74 (s, 2H), 7.66 (d, 1H,  $J$  = 8.8 Hz), 6.90 (dd, 1H,  $J$  = 2.0 Hz,  $J$  = 8.8 Hz), 6.80 (d, 1H,  $J$  = 2.0 Hz), 1.81 (s, 1H);  $^{13}\text{C}$  NM (100 MHz,  $\text{CDCl}_3$ ),  $\delta$  177.0, 175.4, 164.4, 158.8, 156.1, 149.3, 143.0, 131.9, 116.8, 116.6, 114.7, 112.8, 112.0, 110.8, 102.2, 100.0, 99.1, 54.3, 25.4.  $^1\text{H}$  NMR (400 MHz,  $\text{CD}_3\text{COCD}_3$ ),  $\delta$  11.02 (s, 1H, br), 8.59 (s, 1H), 7.90 (d, 1H,  $J$  = 16.4 Hz), 7.84 (d, 1H,  $J$  = 16.2 Hz), 7.66 (d, 1H,  $J$  = 8.6 Hz), 6.93 (d, 1H,  $J$  = 8.6 Hz), 6.84 (s, 1H), 1.91 (s, 1H); HRMS (ESI):  $m/z$   $[\text{M} + \text{Na}]^+$  calcd for  $\text{C}_{21}\text{H}_{13}\text{N}_3\text{NaO}_4$ : 394.0798; found 394.0803.

Ref. 1: M. C. Davis, A. P. Chafin, R. A. Hollins, L. C. Baldwin, E. D. Erickson, P. Zarras, E. Drury, Synth. Commun. 34, 3419-3429.

### 3. Quantum Yields.

Quantum yields were determined using fluorescein as a standard according to the published method.<sup>1</sup> The quantum yield was calculated according to the equation:  $(\Phi_{\text{sample}} = \Phi_{\text{standard}} * (I_{\text{sample}} /$

$I_{\text{standard}} \times (A_{\text{sample}} / A_{\text{standard}})$ ); where  $\Phi$  is the quantum yield,  $\Phi_{\text{standard}} = 0.85$  in 0.1 M NaOH;  $I_{\text{sample}}$  and  $I_{\text{standard}}$  are the integrated fluorescence intensities of the sample and the standard,  $A_{\text{sample}}$  and  $A_{\text{standard}}$  are the optical densities, at the excitation wavelength, of the sample and the standard, respectively.

Quantum yield of Probe 1:  $\Phi = 0.049$ . Quantum yield of Probe 2:  $\Phi = 0.0007$

After the complete reaction with sulfite, the Quantum yield of Probe 2:  $\Phi = 0.0044$

#### 4. The absorption and emission spectrum of probe 1 in different solvents

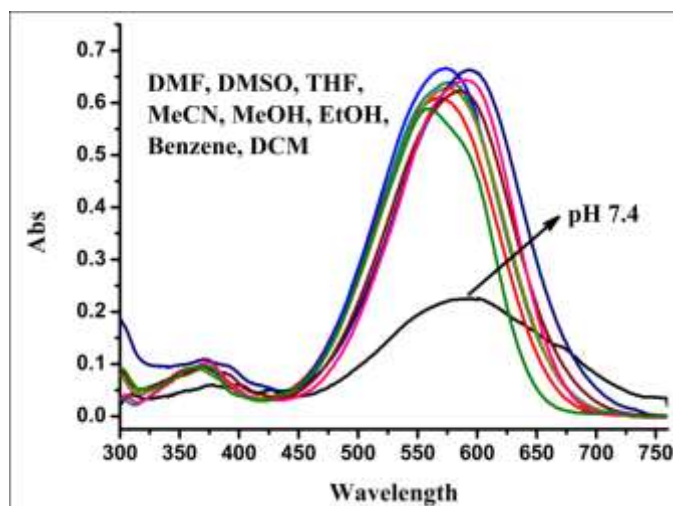

Figure S1. The absorption spectra of probe 1 (2  $\mu\text{M}$ ) in different solvents.

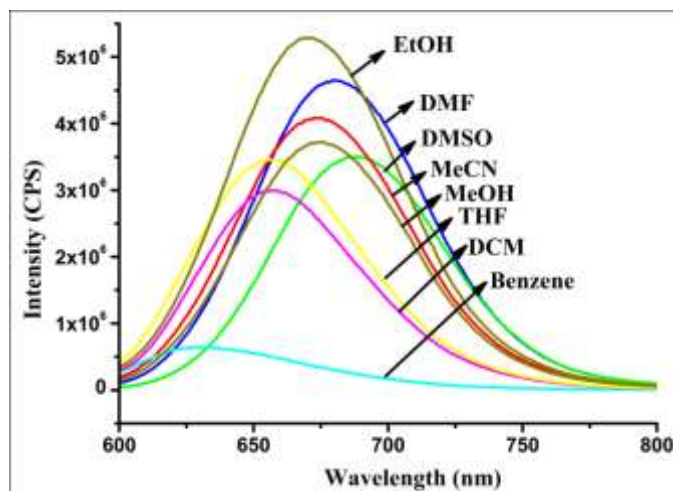

Figure S2. The emission spectra of probe 1 (2  $\mu\text{M}$ ) in different solvents.

#### 5. The fluorescent spectra of probe 1 in different water content solutions

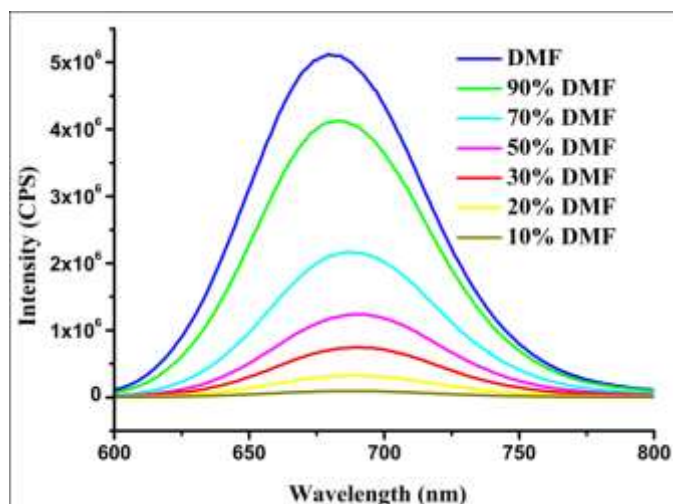

Figure S3. The influence of water content to the fluorescent intensity of probe **1** ( $2\ \mu\text{M}$ ).

## 6. The absorption and emission spectra of probe 2 in different solvents

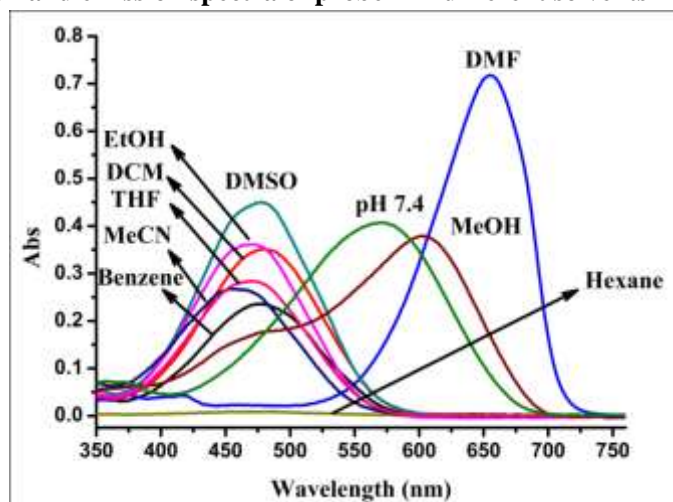

Figure S4. The absorption spectra of probe **2** ( $10\ \mu\text{M}$ ) in different solvents.

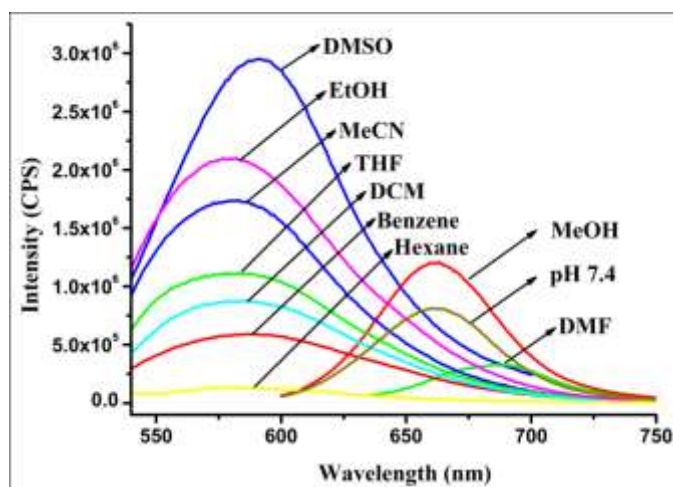

Figure S5. The emission spectrum of probe **2** ( $5\ \mu\text{M}$ ) in different solvents.

## 7. Photophysical properties of probe 1 and probe 2 in various solvents

**Table S1.**

| compound                                  | solvent             | □ □ abs. max nm | □ □ em. max nm |
|-------------------------------------------|---------------------|-----------------|----------------|
| Probe 1                                   | Benzene             | 560             | 628            |
| Probe 1                                   | DCM                 | 590             | 658            |
| Probe 1                                   | DMF                 | 585             | 681            |
| Probe 1                                   | DMSO                | 594             | 688            |
| Probe 1                                   | EtOH                | 575             | 670            |
| Probe 1                                   | MeOH                | 574             | 676            |
| Probe 1                                   | MeCN                | 576             | 673            |
| Probe 1                                   | THF                 | 568             | 658            |
| Probe 1                                   | buffer <sup>a</sup> | 527             | 676            |
| Probe 2                                   | Benzene             | 477             | 589            |
| Probe 2                                   | DCM                 | 480             | 585            |
| Probe 2                                   | DMF                 | 655             | 689            |
| Probe 2                                   | DMSO                | 478             | 592            |
| Probe 2                                   | EtOH                | 471             | 582            |
| Probe 2                                   | MeOH                | 602             | 663            |
| Probe 2                                   | MeCN                | 458             | 585            |
| Probe 2                                   | THF                 | 470             | 583            |
| Probe 2                                   | buffer <sup>a</sup> | 570             | 663            |
| Probe 2                                   | Hexene              | 472             | 581            |
| Probe 2 + Na <sub>2</sub> SO <sub>3</sub> | buffer <sup>a</sup> | 473, 330        | 523            |

Data were obtained in <sup>a</sup>20 mM pH 7.4 HEPES buffer solution.

#### 8. The photobleaching of probe 2 under visible and UV light

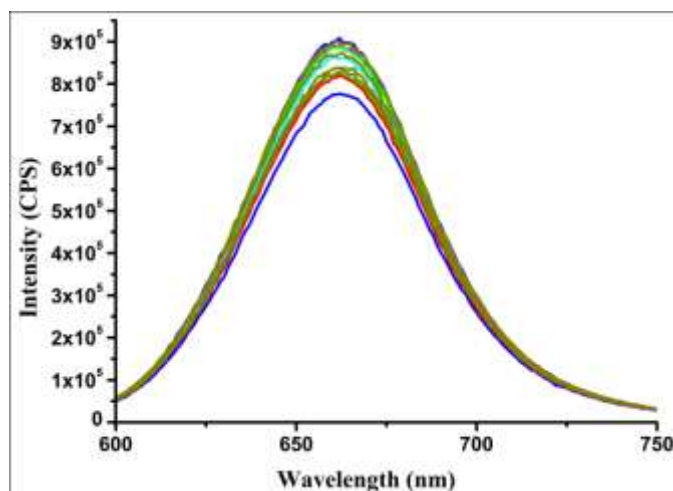

Figure S6. The stability and photobleaching of probe 2 under the shining of the sunshine at 0-6 hours,  $\lambda_{ex} = 580$  nm, Slit: 5 nm/5 nm.

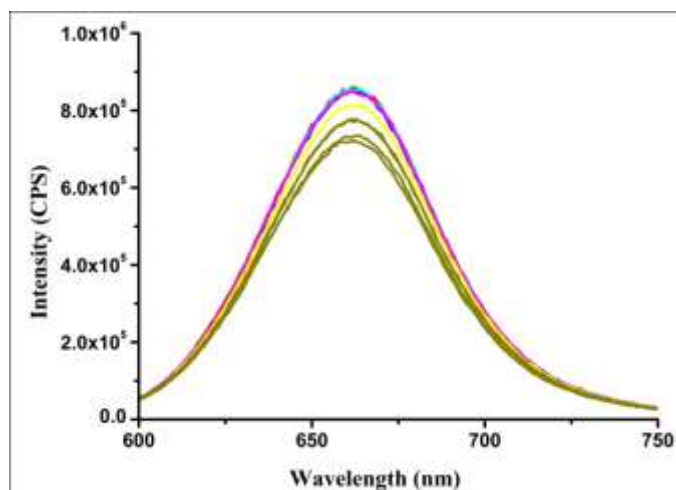

Figure S7. The stability and photobleaching under the UV-lamp (254 and 365 nm at the same time) at 0-6 hours,  $\lambda_{ex} = 580$  nm, Slit: 5 nm/5 nm.

### 9. The absorption and emission spectra of probe 2 in different pH buffer solution

The Britton-Robinson buffer solution was chosen in this part for its wider range from acidity to alkalinity pH. In 100 ml 0.04 mol/L phosphoric acid, acetic acid and boric acid mixture system, 0.2 mol/L NaOH solution was added to adjust the pH from 4 to 12.

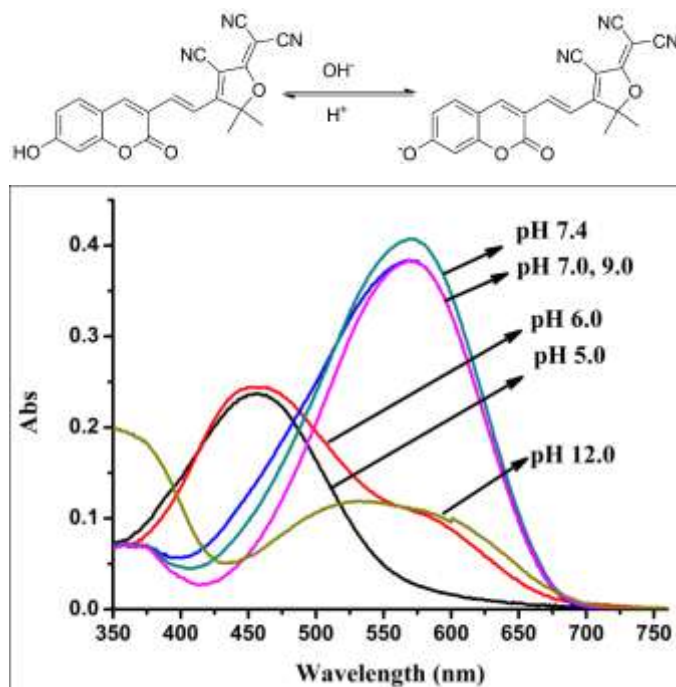

Figure S8. The influence of pH value to the absorption spectrum of probe 2 (10  $\mu$ M).



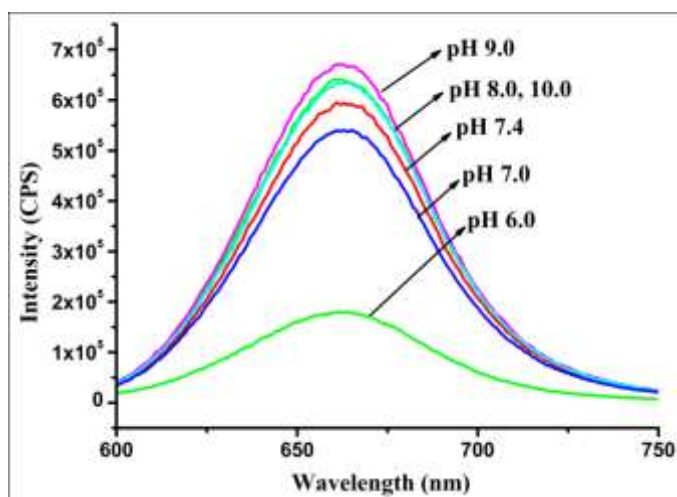

FigureS9. The influence of pH value to the emission spectrum of probe 2(5 $\mu$ M),  $\lambda_{ex}$  = 580 nm, Slit: 5 nm/5 nm.

### 10. The time course of probe 2 with sulfite and bisulfite

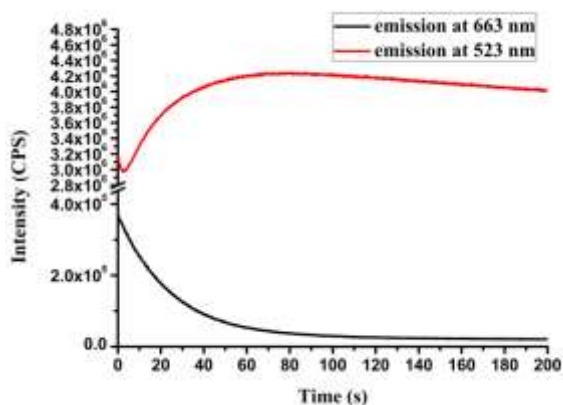

Figure S10. The kinetic response of the sulfute (8 equiv.) to the probe 2 (5  $\mu$ M) in pH 7.4 HEPES buffer solution (for black line:  $\lambda_{ex}$  = 580 nm,  $\lambda_{em}$  = 663 nm, Slit: 5 nm/5 nm; for red line:  $\lambda_{ex}$  = 466 nm,  $\lambda_{em}$  = 523 nm, Slit: 5 nm/5 nm).

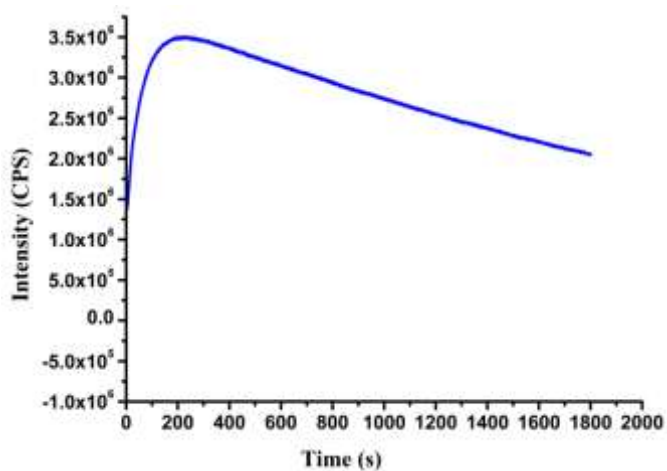

Figure S11. The kinetic response of the sulfute (4 equiv.) to the probe 2 (5  $\mu$ M) in pH 7.4 HEPES buffer solution ( $\lambda_{ex}$  = 580 nm,  $\lambda_{em}$  = 663 nm, Slit: 5 nm/5 nm)



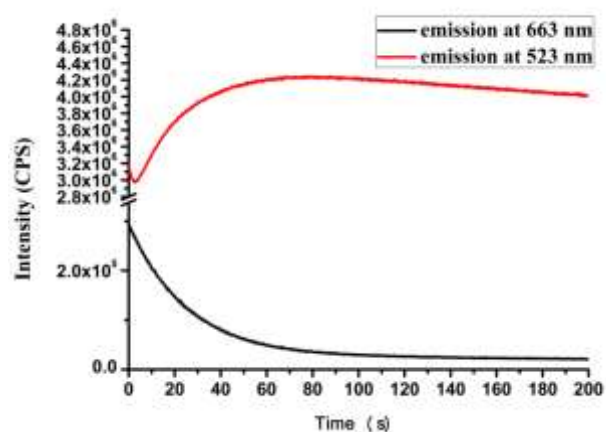

Figure S12. The kinetic response of the bisulfite (8 equiv.) to the probe 2 (5  $\mu$ M) in pH 7.4 HEPES buffer solution (for black line:  $\lambda_{\text{ex}}$  = 580 nm,  $\lambda_{\text{em}}$  = 663 nm, Slit: 5 nm/5 nm; for red line:  $\lambda_{\text{ex}}$  = 466 nm,  $\lambda_{\text{em}}$  = 523 nm, Slit: 5 nm/5 nm).

# 11. The influence of pH value to emission spectrum and intensity ratio changes of the reaction between probe 2 with sulfite

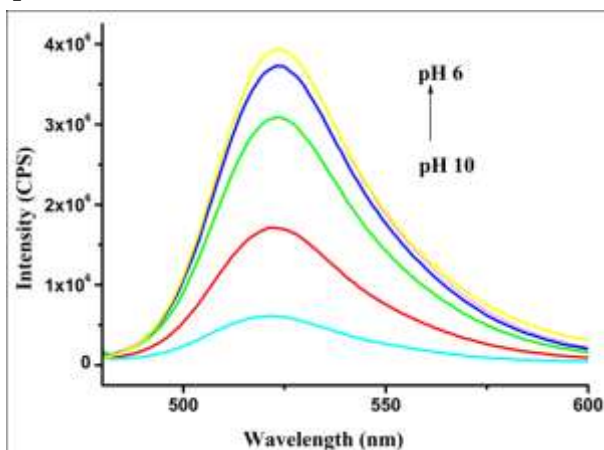

Figure 13. The influence of pH value to the reaction of probe 2(5 $\mu$ M)with sulfite (40  $\mu$ M),  $\lambda_{\text{ex}}$  = 466 nm. Slit: 5 nm/5 nm.

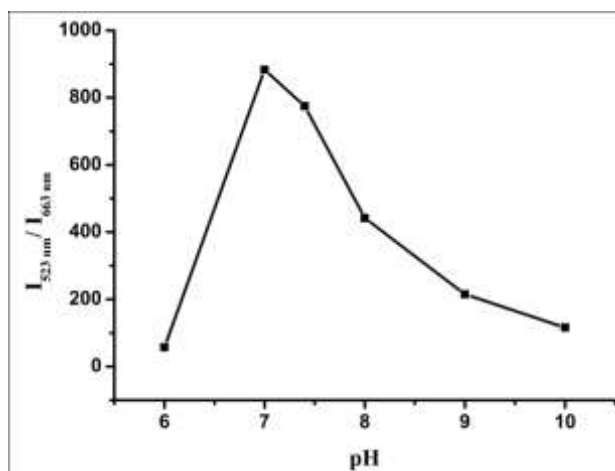

Figure 14. The influence of pH value to intensity ratio at 523 nm and 663 nm.

## 12. The detection limit of probe 2

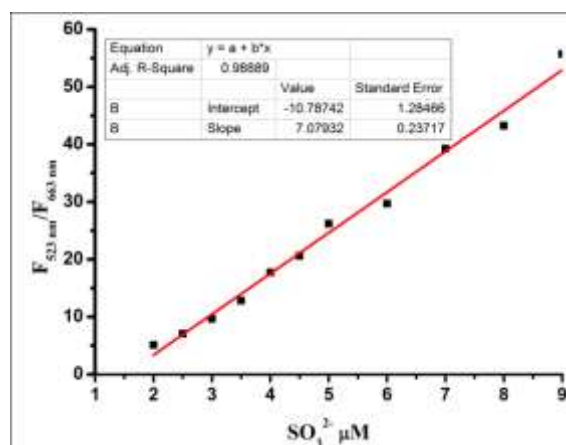

Figure S15. The line relationship between the fluorescent intensity ratio of the probe **2** (5  $\mu\text{M}$  at 523 nm and 663 nm) and the concentration of the sulfite at 2 to 9  $\mu\text{M}$  in 20 mmol pH 7.4 buffer solution.

Ref. 2: B. P. Joshi, J. Park, W. I. Lee and K. Lee, *Talanta*.**2009**, 78, 903-909.

## 13. The fluorescent titration and detection limit of probe 2 with bisulfite

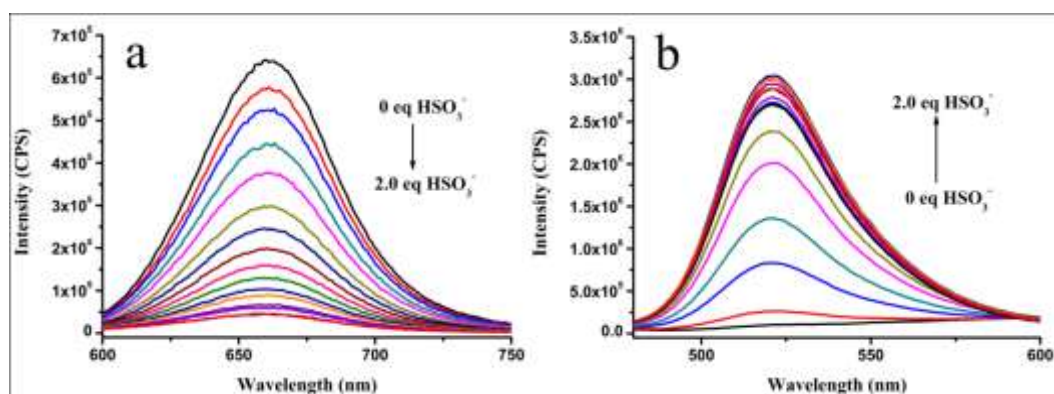

Figure S16. Fluorescence titration of probe **2** (5  $\mu\text{M}$ ) with  $\text{HSO}_3^-$  (0, 0.5, 1.0, 1.5, 2.0, 2.5, 3.0, 3.5, 4.0, 4.5, 5.0, 6.0, 7.0, 8.0, 9.0, 10.0  $\mu\text{M}$ , 0-2 equiv.) (for a:  $\lambda_{\text{ex}}$  = 580 nm. Slit: 5 nm/5 nm; for b:  $\lambda_{\text{ex}}$  = 466 nm. Slit: 5 nm/5 nm,) in 20 mM pH 7.4 HEPES buffer solution.

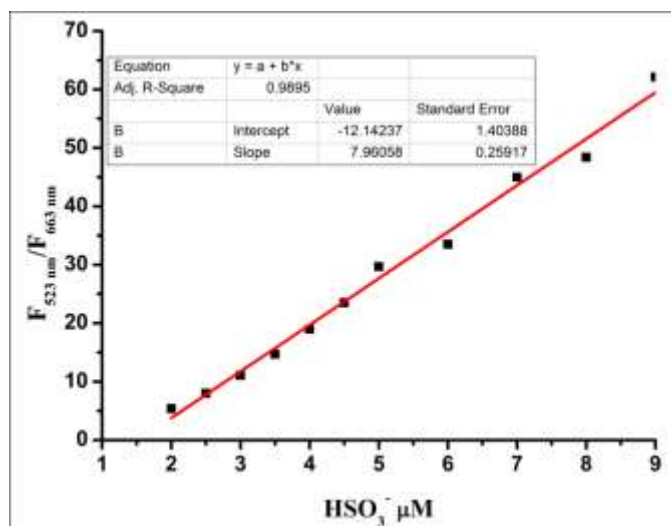

Figure S17. The line relationship between the fluorescent intensity ratio of the probe **2** (5  $\mu$ M at 523 nm and 663 nm) and the concentration of the sulfite at 2 to 9  $\mu$ M in 20 mmol pH 7.4 buffer solution.

#### 14. The high resolution mass spectrum and $^1\text{H}$ NMR spectrum of probe **2** with sulfite

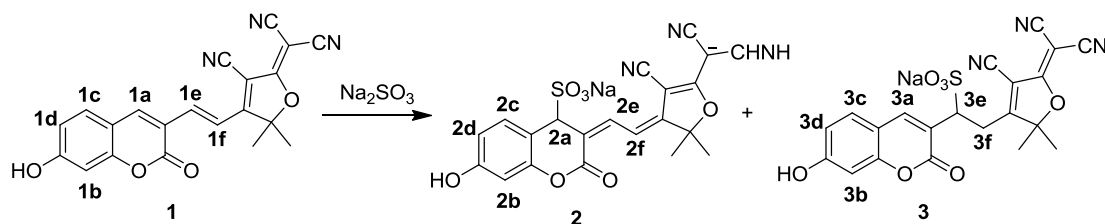

Scheme S1. The proposed reaction mechanism of probe **2** with sulfite

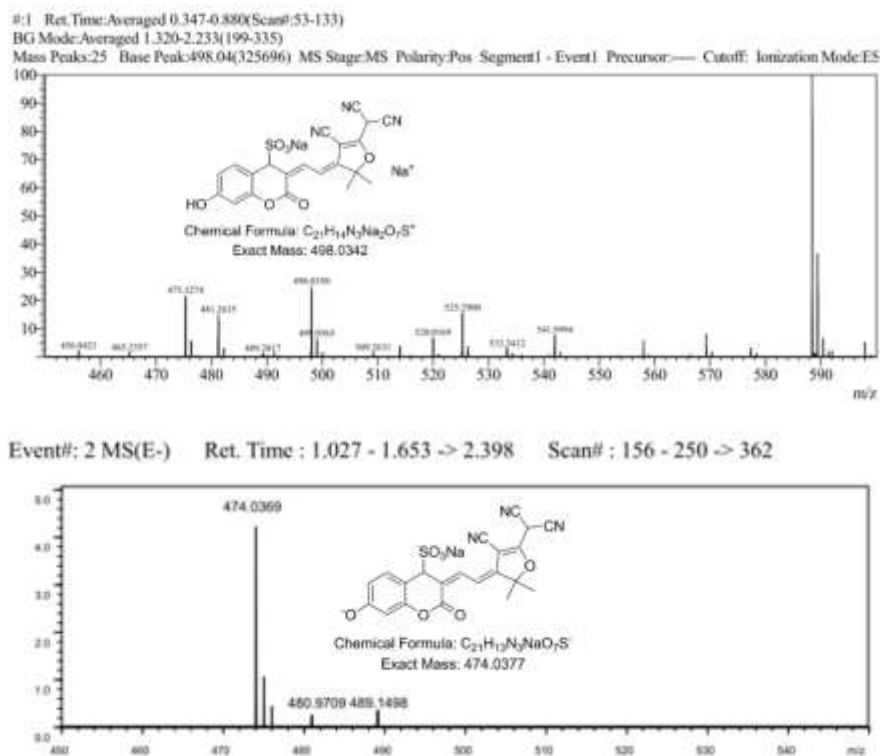

Figure S18. The high resolution mass spectrum of probe **2** with sulfite.

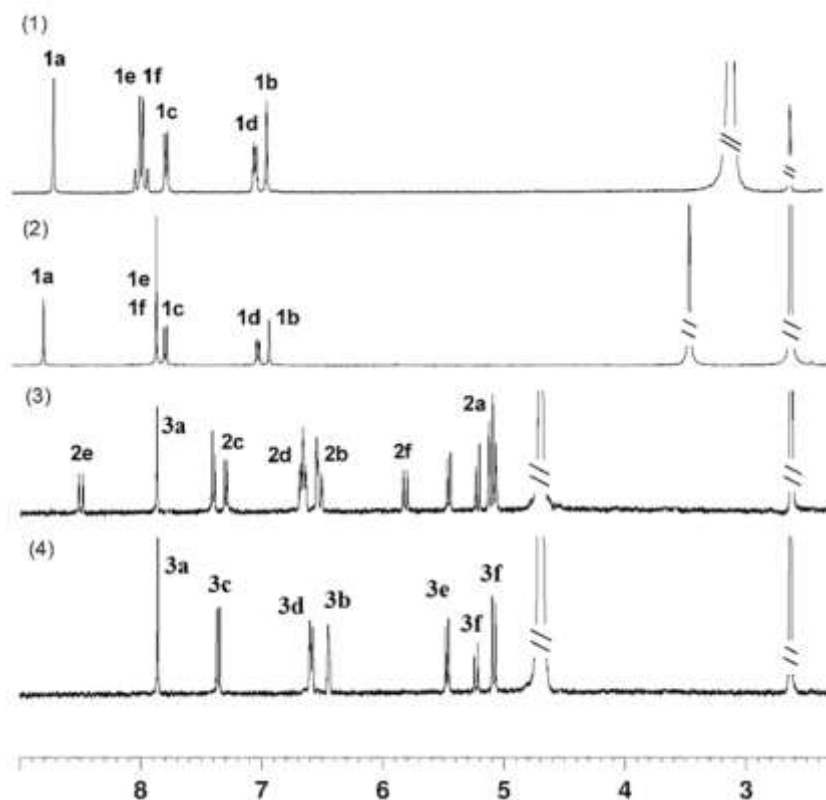

Figure 19.  $^1\text{H}$  NMR spectra of 5 mM probe 2 (1: in 0.5 ml  $\text{CD}_3\text{COCD}_3$ , and 50  $\mu\text{L}$   $\text{DMSO}-d_6$  as the co-solvent; 2: in  $\text{DMSO}-d_6$ ), and 5 mM probe 2 with 2 equiv. sulfite in  $\text{DMSO}-d_6$ :  $\text{D}_2\text{O} = 1:4$  (3: 2h, 4: 24h).

### 15. The absorption spectra of TCF, probe 2 and the reaction of probe 2 with sulfite

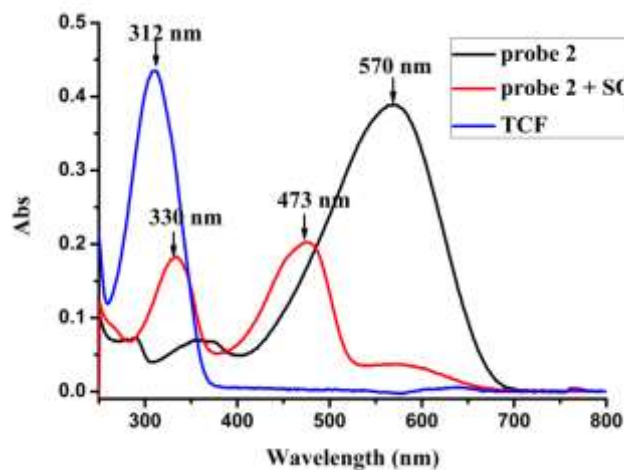

Figure S20. The absorption spectra of TCF, probe 2 and the reaction between probe 2 (10  $\mu\text{M}$ ) with 8 equiv sulfite in 20 mmol pH 7.4 buffer solution.

### 16. The response of $\text{SO}_2$ releasing agent to probe 2

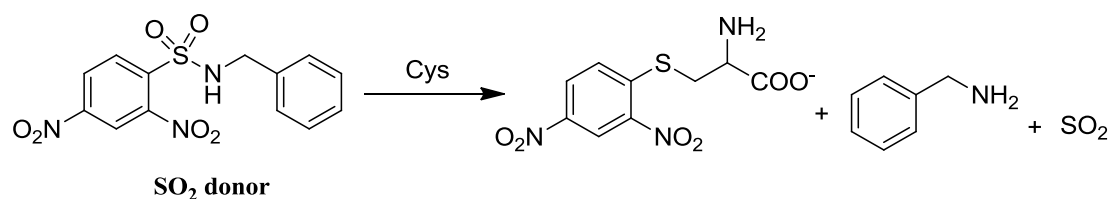

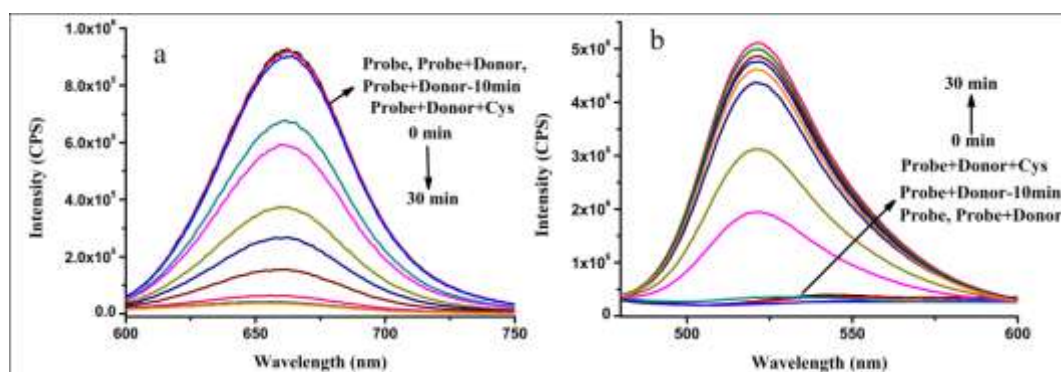

Figure S21. Time-dependent fluorescent spectra of probe (5  $\mu\text{M}$ ) +  $\text{SO}_2$  donor (40  $\mu\text{M}$ ) upon addition of 400  $\mu\text{M}$  Cys in 20 molol pH 7.4 HEPES buffer solution (for a:  $\lambda_{\text{ex}}$  = 580 nm. Slit: 5 nm/5 nm,  $\lambda_{\text{scan}}$  = 600 – 750 nm; for b:  $\lambda_{\text{ex}}$  = 466 nm. Slit: 5 nm/5 nm,  $\lambda_{\text{scan}}$  = 480 – 600 nm).

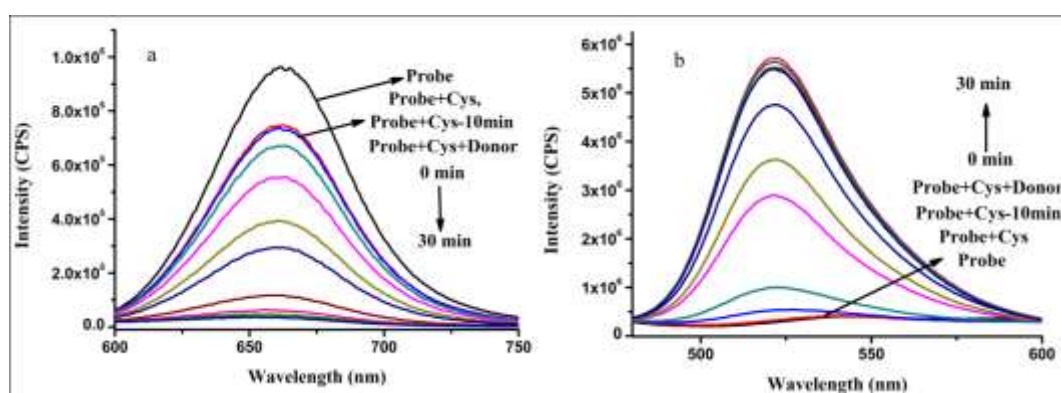

Figure S22. Time-dependent fluorescent spectra of probe (5  $\mu\text{M}$ ) + 400  $\mu\text{M}$  Cys upon addition of  $\text{SO}_2$  donor (40  $\mu\text{M}$ ) in 20 molol pH 7.4 HEPES buffer solution (for a:  $\lambda_{\text{ex}}$  = 580 nm. Slit: 5 nm/5 nm; for b:  $\lambda_{\text{ex}}$  = 466 nm. Slit: 5 nm/5 nm.).

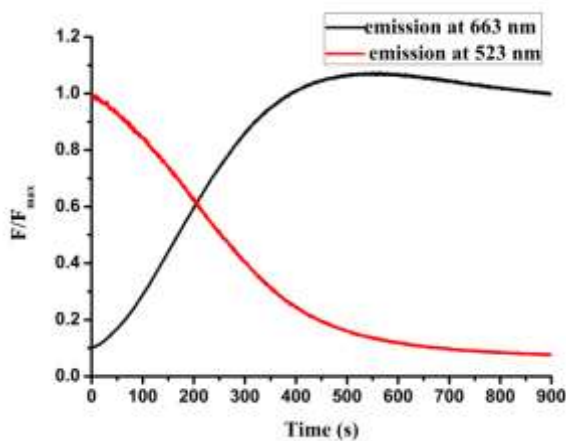

Figure S23. The time course of the response between probe 2 with the  $\text{SO}_2$  donor and Cys (for black line:  $\lambda_{\text{ex}}$  = 580 nm,  $\lambda_{\text{em}}$  = 663 nm, Slit: 5 nm/5 nm; for red line:  $\lambda_{\text{ex}}$  = 466 nm,  $\lambda_{\text{em}}$  = 523 nm, Slit: 5 nm/5 nm).

## 17. Cell toxicity test.

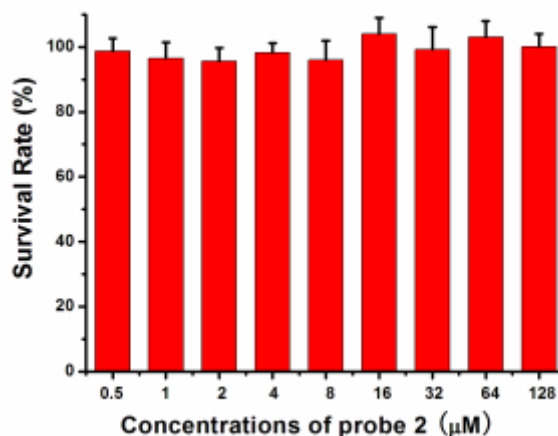

Figure S24. Cell viability by a standard MTT assay, the experiment was repeated three times and the data are shown as mean ( $\pm$ S.D.).

### 18. Cell culture fluorescence imaging

The U-2OS cell were grown in RPMI 1640 medium supplemented with 10% FBS (Fetal Bovine Serum) and 1% antibiotics at 37 °C in humidified environment of 5% CO<sub>2</sub>. Cells were plated on 6-well plate at  $5 \times 10^6$  cells per well and allowed to adhere for 12 hours. Fluorescence imaging was performed with a LEICA TCS-SP5 Laser Scanning Confocal Microscope with a 40  $\times$  oil-immersion objective lens. Before the experiments, cells were washed with PBS and then incubated with probe **2** (10  $\mu$ M) in PBS for 30 min at 37 °C. Experiments to assess SO<sub>3</sub><sup>2-</sup> uptake were performed in the same media supplemented with 80  $\mu$ M Na<sub>2</sub>SO<sub>3</sub> or 80  $\mu$ M SO<sub>2</sub> donor and 800  $\mu$ M Cys for 30 min at 37 °C. Cell imaging was then carried out after washing cells with physiological saline. Emission was collected at 465~530 nm (excited at 488 nm) for green channel and at 600~700 nm (excited at 543 nm) for red channel.

19. <sup>1</sup>H NMR and <sup>13</sup>C NMR spectra.

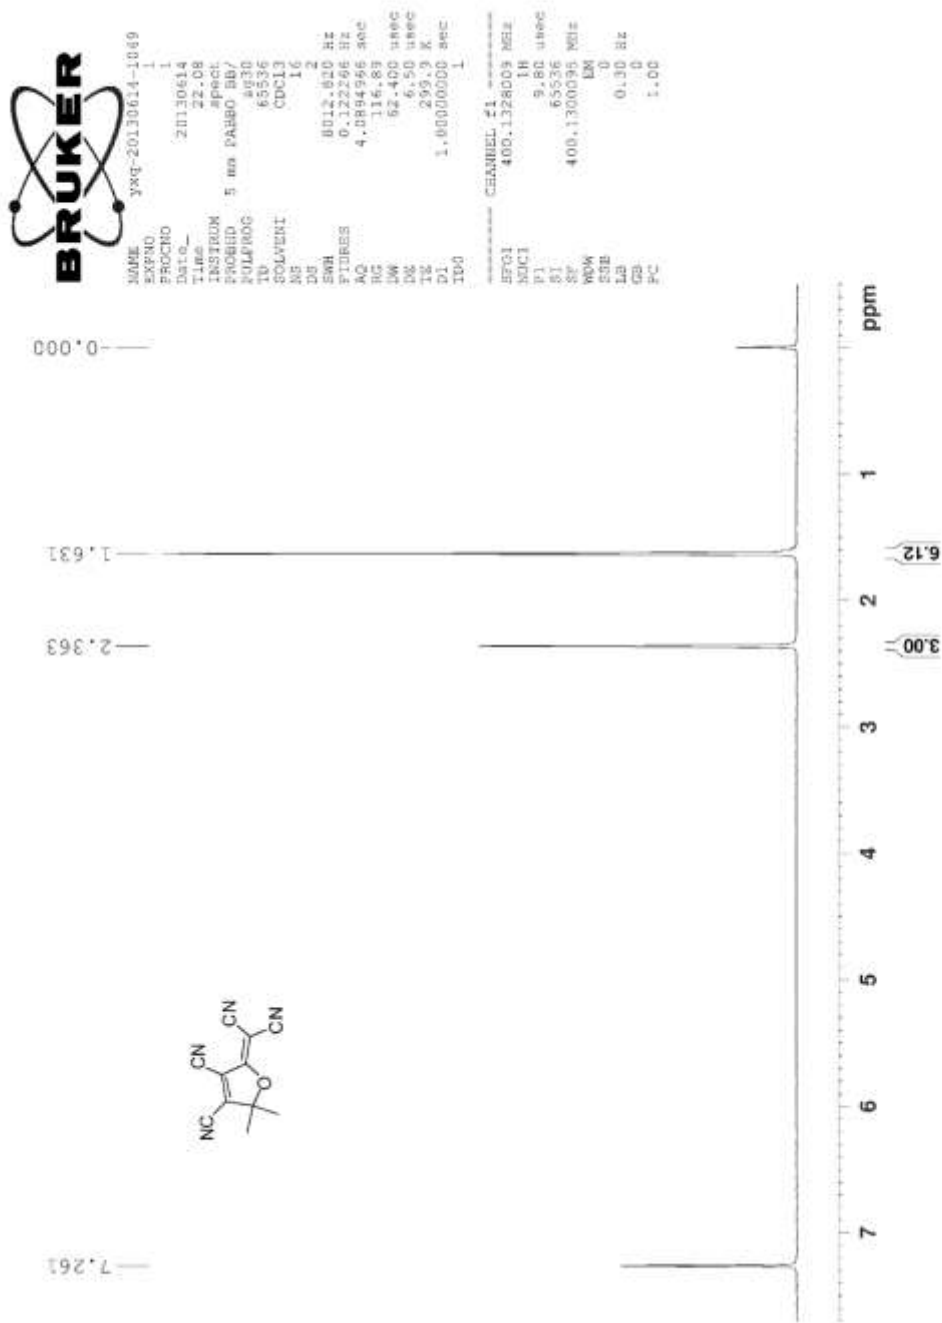



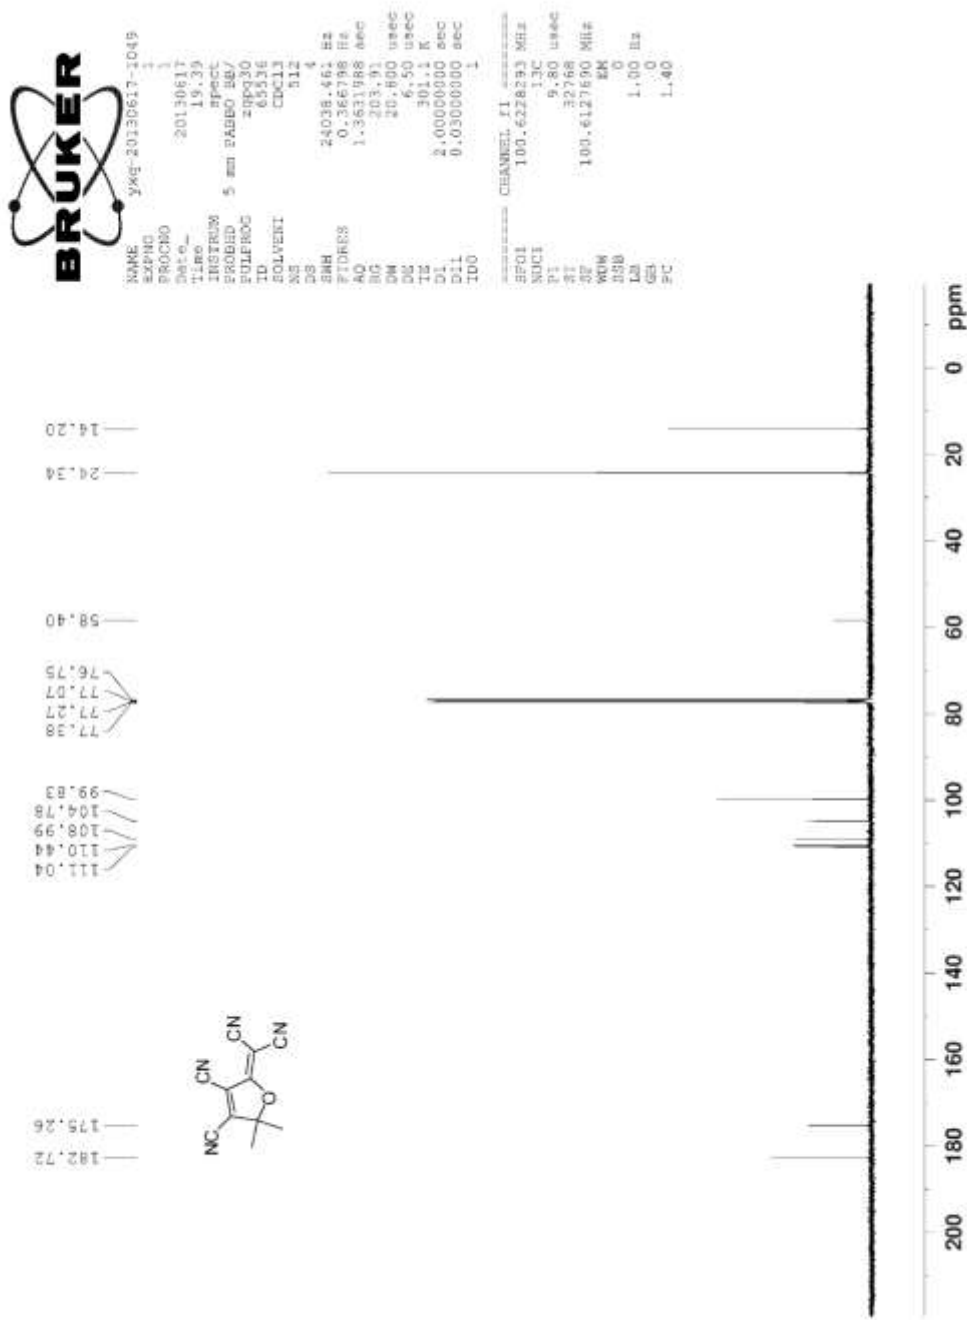



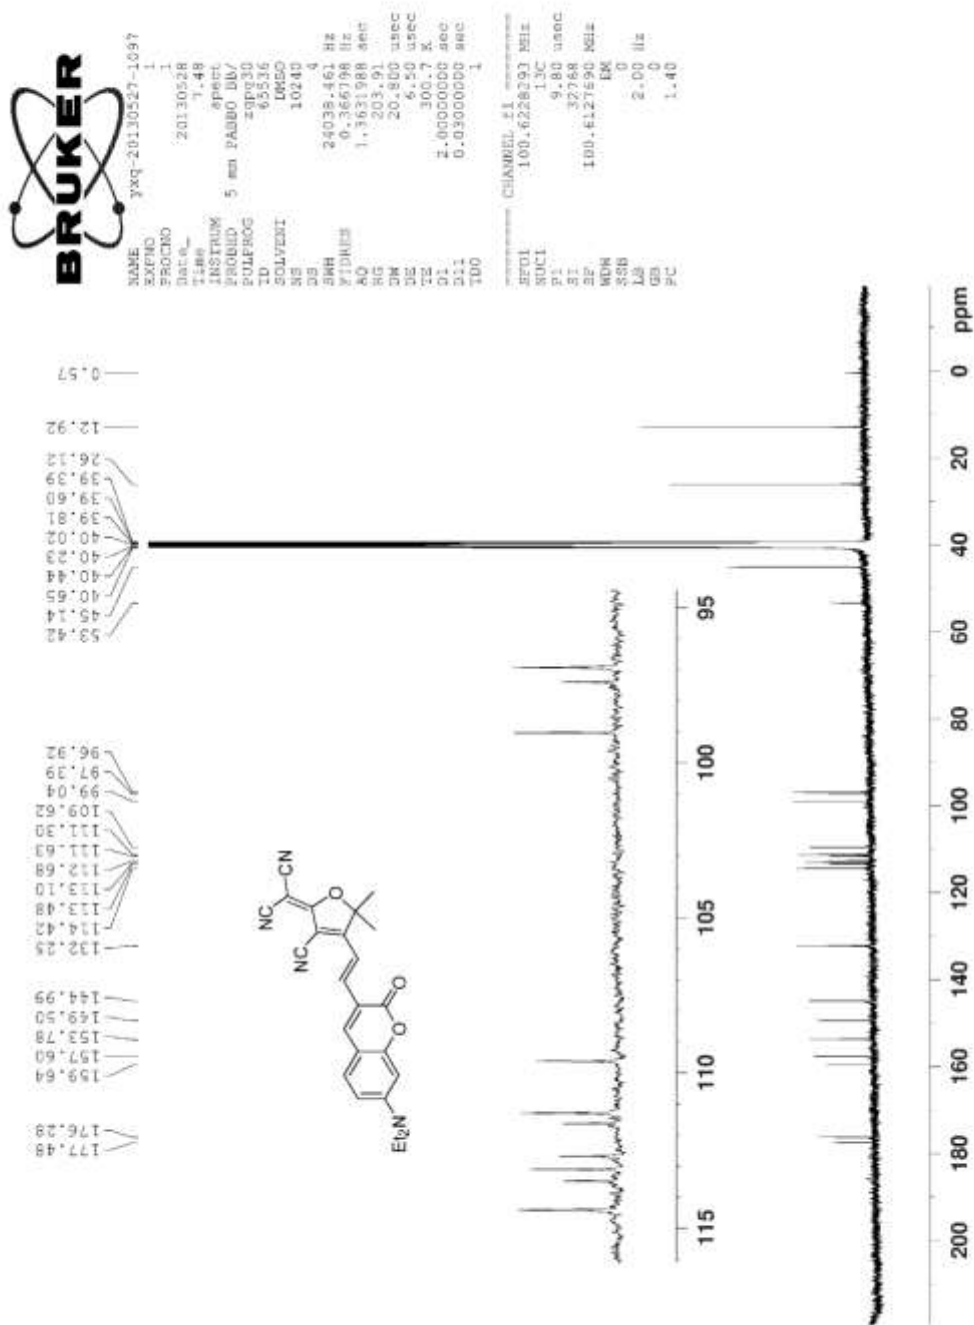

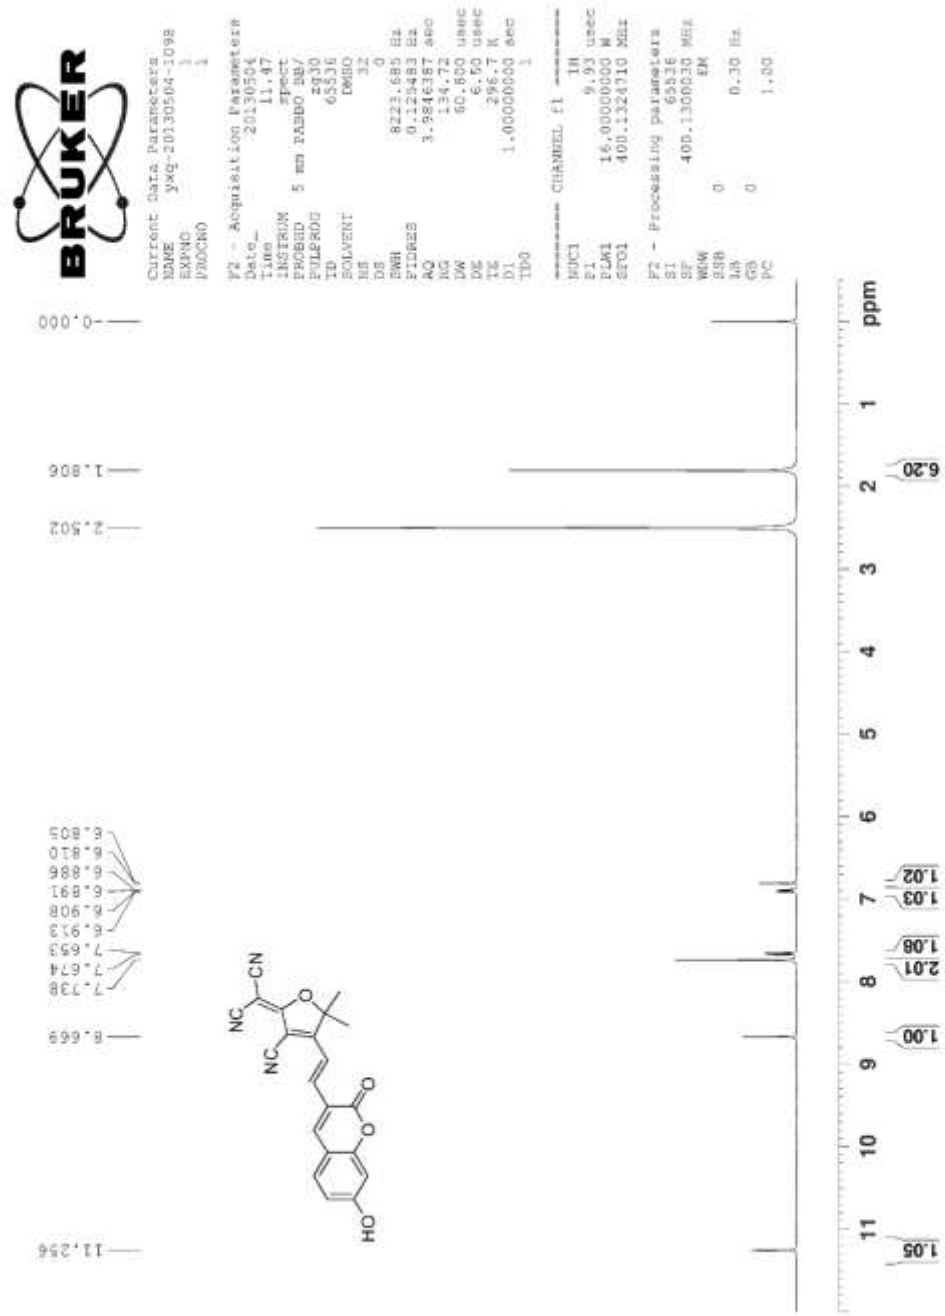

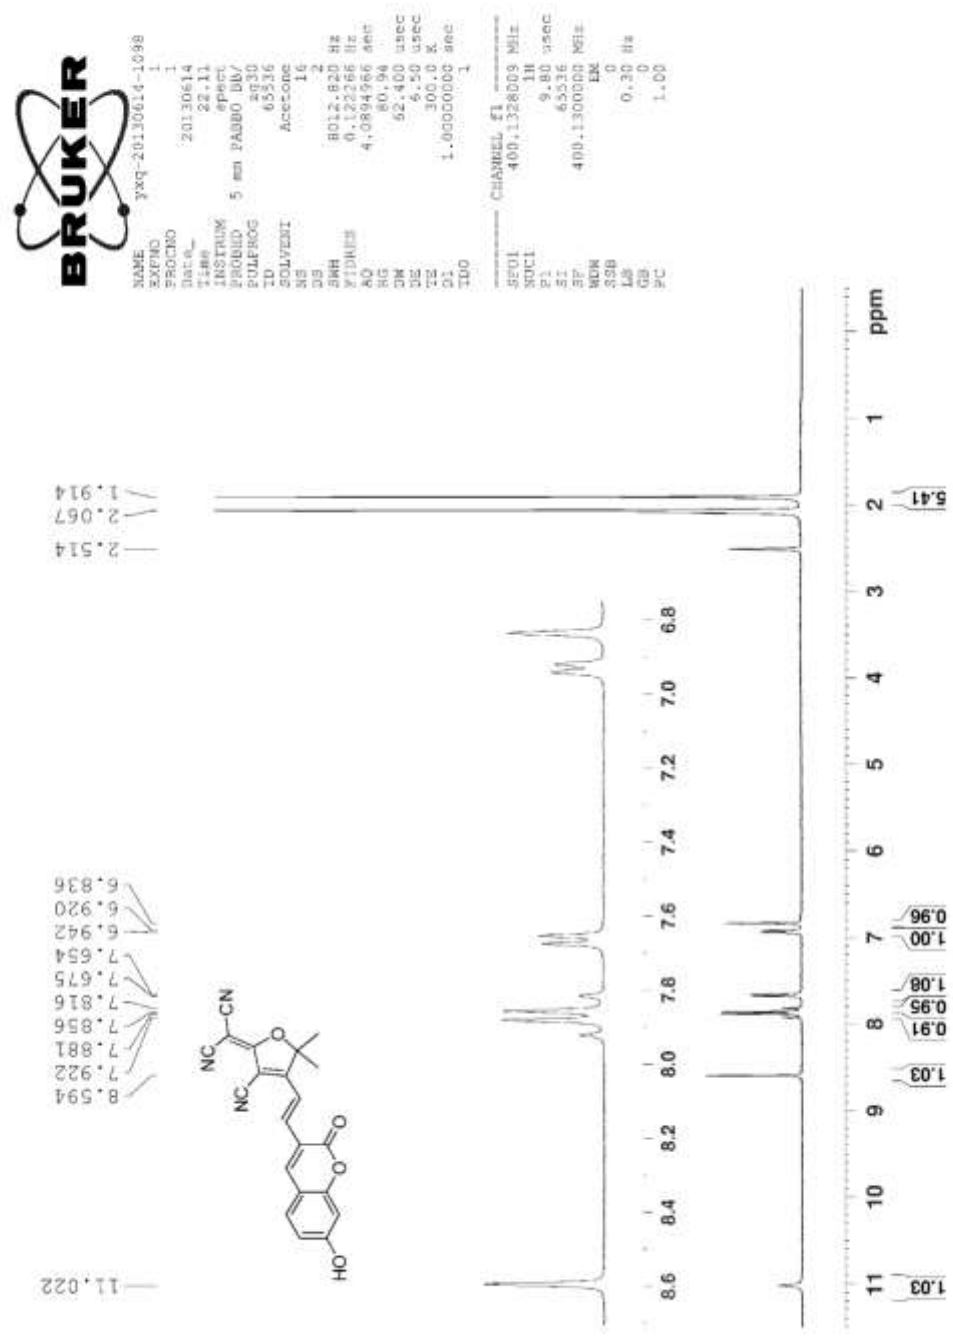

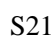

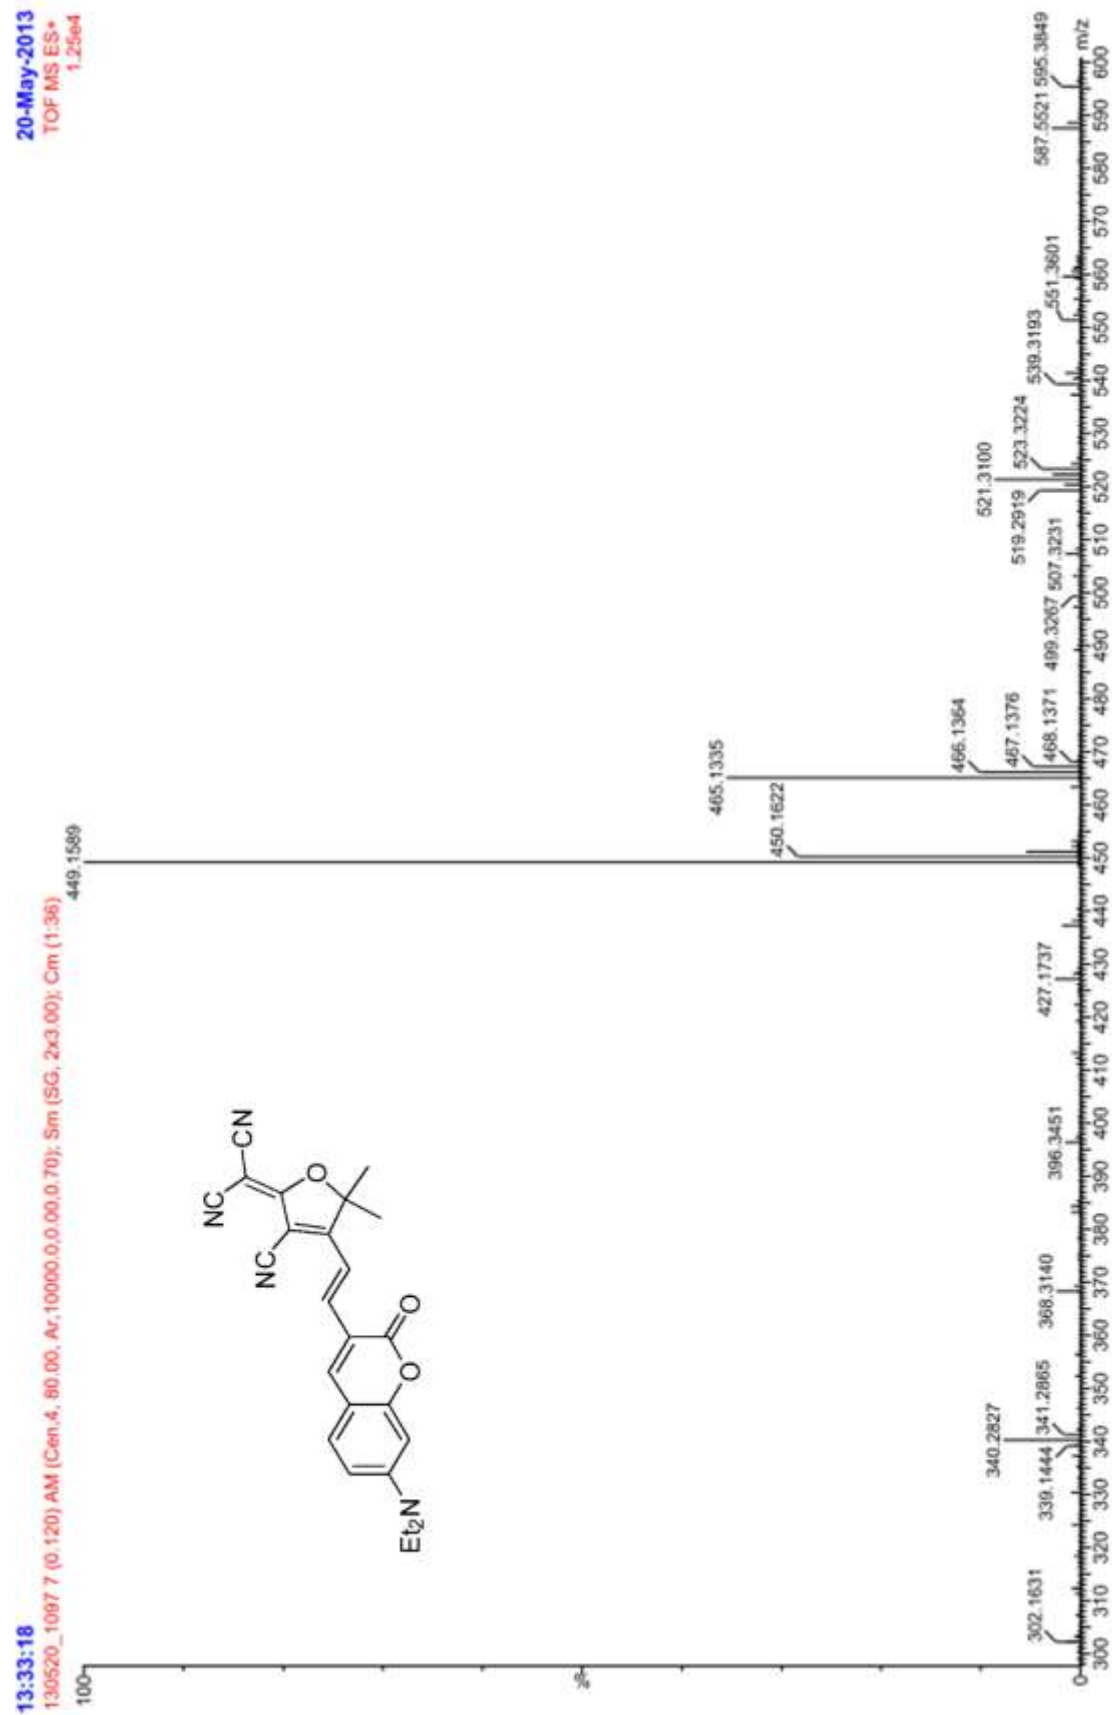



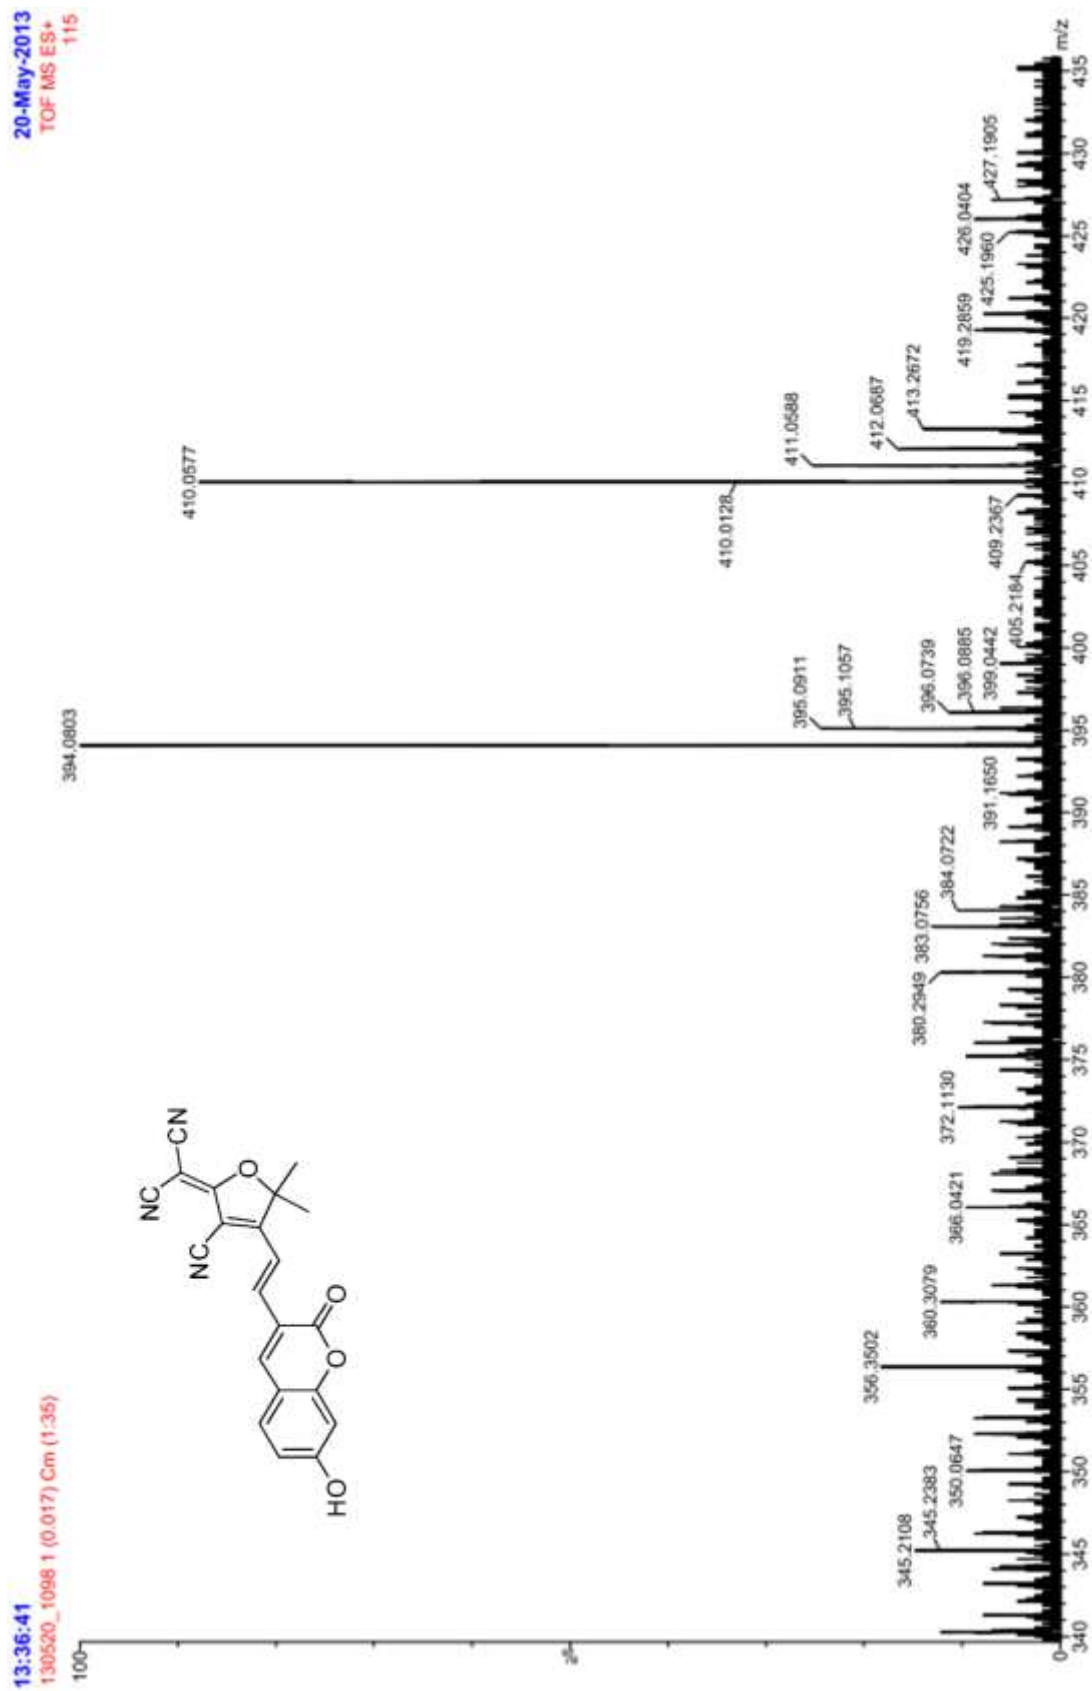

Supplement: c3cc46468g.pdf [file c3cc46468g.pdf]
